# Supplementary material for: Regulated interaction of ID2 with the anaphase-promoting complex links progression through mitosis with reactivation of cell-type-specific transcription
Source: PubMed Central journal article supplement (PMC9018835; doi:10.1038/s41467-022-29502-2), 2022-04-19
Supplement: 41467_2022_29502_MOESM2_ESM.pdf [file 41467_2022_29502_MOESM2_ESM.pdf]

## **Description of Additional Supplementary Files**

File Name: Supplementary Data 1

Description: Differential expression analysis between ID2 Ser-5D versus wt and empty vector.

File Name: Supplementary Data 2

Description: Gene ontology enrichment analysis between ID2 Ser-5D versus wt expressing samples collected 10 h after double thymidine block.

File Name: Supplementary Data 3

Description: ImpulseDE2 analysis between ID2 Ser-5D versus wt expressing samples collected 10 h after double thymidine block.
